# Supplementary material for: Relationship Between Emotion Regulation and Non-suicidal Self-injury (NSSI): a Systematic Review and Meta-analysis Protocol
Source: Research Square preprint supplement (doi:10.21203/rs.3.rs-1029180/v1), 2021-11-15
Supplement: Supplementary file 1 [file a7407d79e5873020db2aa00e.docx]

Additional file 2: search strategy for PubMed database

("emotion regulation"[tiab] OR "emotional regulation"[tiab] OR emotion‐regulat*[tiab] OR "emotional self‐regulation"[tiab] OR "affect regulation"[tiab] OR "mood regulation"[tiab] OR "emotion dysregulation"[tiab] OR "emotional dysregulation"[tiab] OR "affect dysregulation"[tiab] OR "emotional coping"[tiab] OR "mood dysregulation"[tiab] OR "emotion modulation"[tiab] OR "emotional modulation"[tiab] OR "affect modulation" OR "affective modulation" OR "emotion reactivity" OR "emotional reactivity" OR "affect reactivity" OR "affective regulation" OR "affective dysregulation" OR "affective functioning" OR "emotional functioning" OR "affective labelling" OR "affective labeling" OR "affect labelling" OR "affect labeling" OR "emotion labelling" OR "emotion labeling" OR "emotional affect" OR "emotional experience" OR expression OR "emotion control" OR "emotional control" OR "emotion self‐efficacy" OR "emotional self‐efficacy" OR "emotion management" OR "emotional management" OR "emotional competence" OR "emotional competency" OR "emotion competency" OR "self regulation" OR self‐regulation OR self‐control OR "self control" OR "effortful control" OR "response modulation" OR "emotional disturbance" OR "emotional response" OR "emotion response" OR "behavioral response modulation" OR "Inhibitory control" OR "emotion inhibition" OR "emotion processing" OR "emotional processing" OR "adaptive strategies" OR "maladaptive strategies" OR "regulation strategies" OR "emotional disengagement strategies" OR "self‐focused regulatory strategies" OR "emotion regulation strategies" OR "antecedent‐focused strategies" OR "response focused strategies" OR "emotion‐regulatory processes" OR "emotion‐regulatory process" OR "emotion regulatory processes" OR "top‐down regulation" OR "top‐down emotion regulation" OR "bottom‐up regulation" OR "bottom‐up emotion regulation" OR up‐ regulat* OR down‐regulat* OR "emotional recovery" OR enhancing OR dampening OR "response‐focused emotion" OR affect* OR mood* OR feel* OR repair* OR conscious* OR differenti* reapprais* OR "cognitive restructuring" OR "cognitive regulatory strategies" OR "thought substitution" OR "attentional deployment" OR "cognitive change" OR mindful* OR accept* OR "problem solving" OR problem‐solving OR interperson* OR "putting in perspective" OR refocus* OR planning OR revaluation OR forgetting OR giving‐up OR "Humor enhancement" OR "goal‐directed behavior" OR "emotional awareness" OR "emotional clarity" OR "social support" OR distancing OR decentering OR selfcompassion OR "self compassion" OR tolera* OR distraction suppress* OR worry OR ruminat* OR "mind wandering" OR self‐blame OR other‐blame OR avoid* OR withdrawal OR "inhibitory deficits" OR non‐acceptance OR catastrophizing OR self‐devaluation OR "impulse control" OR impulsivity OR "aggressive actions" OR "attention bias to threat") AND ((Behavior[tiab] AND Self-Injurious[tiab]) OR (Behaviour[tiab] AND Self-Injurious[tiab]) OR “Self Injurious Behav,ior”[tiab] OR “Self Injurious Behaviour”[tiab] OR “Self-Injurious Behavior”[tiab] OR “Self-Injurious Behaviour”[tiab] OR “Self Injury”[tiab] OR “Self Injuries”[tiab] OR Self-Injur*[tiab] OR “Self-Destructive Behavior”[tiab] OR “Self-Destructive Behaviour”[tiab] OR (Behavior AND Self-Destructive) OR (Behaviour AND Self-Destructive) OR “Self Destructive Behavior” OR “Self Destructive Behaviour” OR Self-Harm* OR “Self Harm” OR “Self Mutilation” OR (Self AND Mutilation) OR NSSI OR DSH OR “self-inflicted wound” OR “self-inflicted injury” OR self-poisoning OR (self AND poisoning) OR skin-cutting OR parasuicide OR SIB OR SASI OR D-SIB OR self-cutting)
